# Supplementary material
Source: Royal Society of Chemistry journal article supplement (doi:10.1039/d6ay00117c)
Supplement: d6ay00117c1.pdf [file d6ay00117c1.pdf]

## Supporting Information

# Single Probe Cascade Determination of Multiple Analytes by Tandem Reaction of Copper Nanoclusters

Bo Zhao,<sup>a</sup> Huijun Zhang,<sup>a</sup> Liuyang Wang,<sup>a</sup> Weiping Chen,<sup>a</sup> Liping Fang,<sup>\*a</sup> Xinwu Ba<sup>\*ab</sup> and Libin Bai<sup>\*a</sup>

<sup>a</sup> College of Chemistry and Material Science, Hebei University, Baoding 071002, China

<sup>b</sup> Affiliated Hospital of Hebei University, Baoding 071000, China

\*Corresponding Author:

Email: lipingfang@hbu.edu.cn; baxw@hbu.edu.cn; zhonggou556@hbu.edu.cn

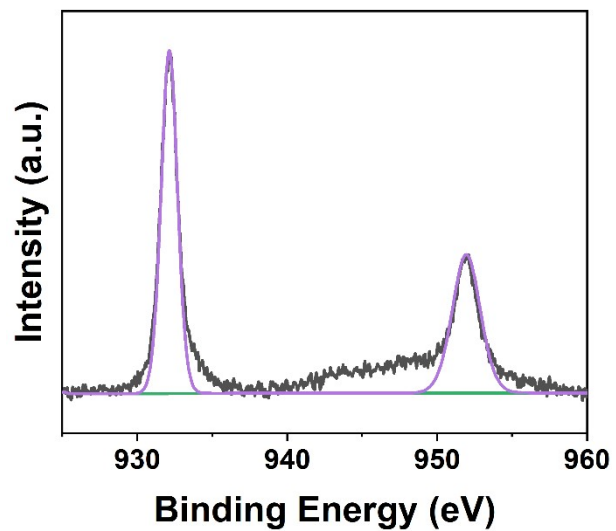

**Fig. S1** XPS of the Cu 2p spectrum in Cu NCs.

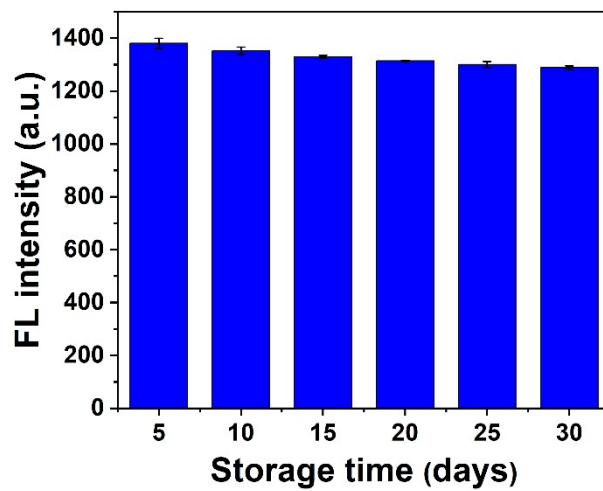

**Fig. S2** Effect of storage time on fluorescence intensity of Cu NCs.

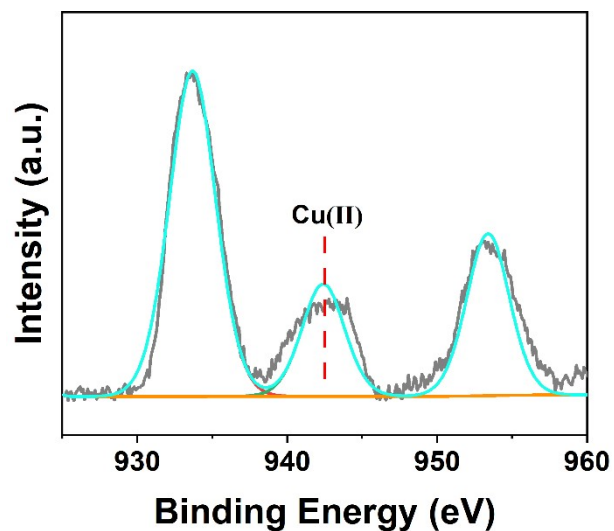

Fig. S3 XPS of the Cu 2p spectrum in Cu NCs after treatment with BPO.

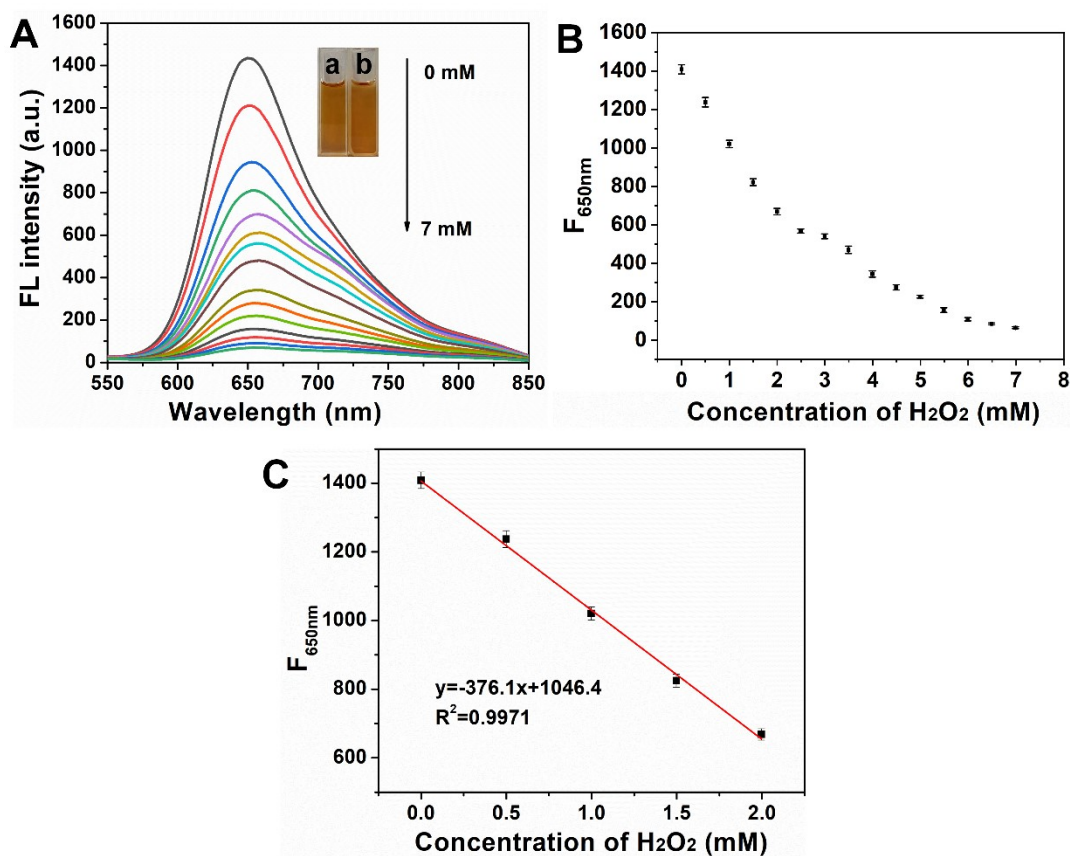

Fig. S4 (A) Fluorescence spectra of Cu NCs in the presence of different concentrations of  $\text{H}_2\text{O}_2$ . Inset: Images of Cu NC solution (a) before and (b) after introduction of  $\text{H}_2\text{O}_2$ . (B) Fluorescence intensity of Cu NCs versus  $\text{H}_2\text{O}_2$  concentrations. (C) Calibration curve between fluorescence intensity of Cu NCs and  $\text{H}_2\text{O}_2$  concentrations.
